# Supplementary material for: Condensin minimizes topoisomerase II‐mediated entanglements of DNA in vivo
Source: PubMed Central journal article supplement (PMC7780148; doi:10.15252/embj.2020105393), 2020-11-06
Supplement: EMBJ-40-e105393-s001.pdf [file EMBJ-40-e105393-s001.pdf]

# **Condensin minimizes topoisomerase II-mediated entanglements of DNA *in vivo***

Sílvia Dyson, Joana Segura, Belén Martínez-García, Antonio Valdés, and Joaquim Roca\*

## **Appendix**

**Figure S1. Plasmids and minichromosomes analyzed in the study.**

**Figure S2. Drop assays of yeast strains used in the study.**

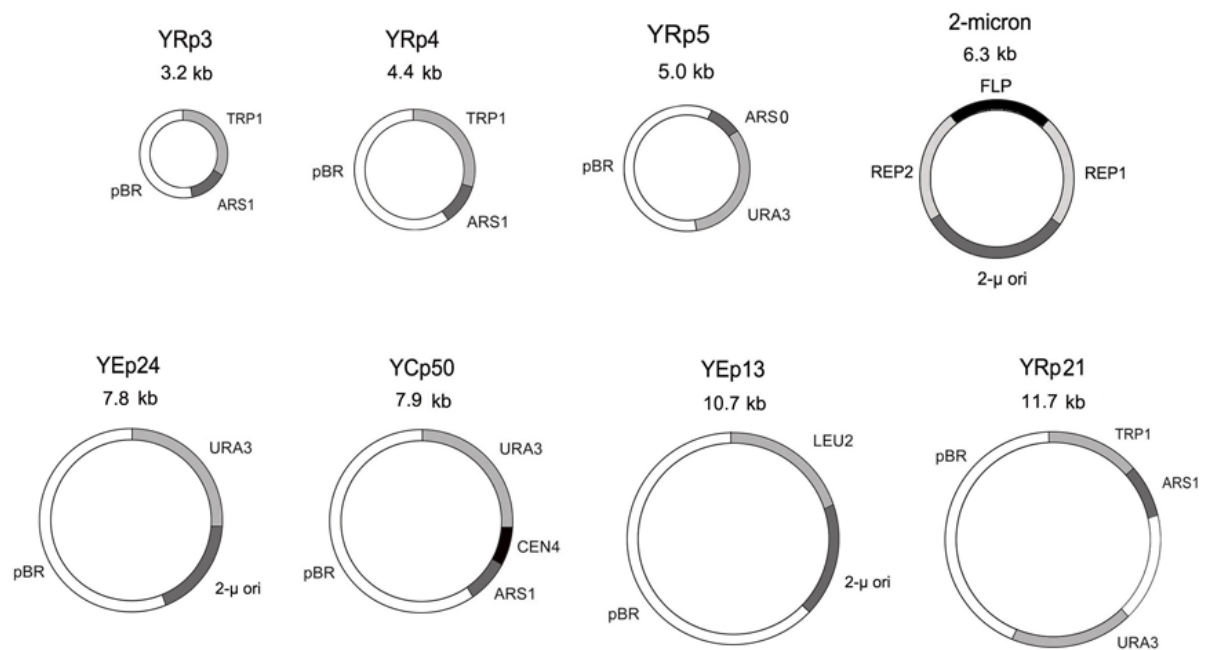

**Appendix Figure S1. Plasmids and minichromosomes analyzed in the study.**

Minichromosomes containing pBR sequences were amplified as bacterial plasmids in *Escherichia coli* and used to transform *Saccharomyces cerevisiae*. The 2-micron plasmid was endogenous in all the yeast strains used. Minichromosomes differed in size, replication origins (autonomous replication sequences (ARS) or 2-micron origin), presence of centromere (CEN), and selectable gene markers (TRP1, URA3, LEU2) as indicated.

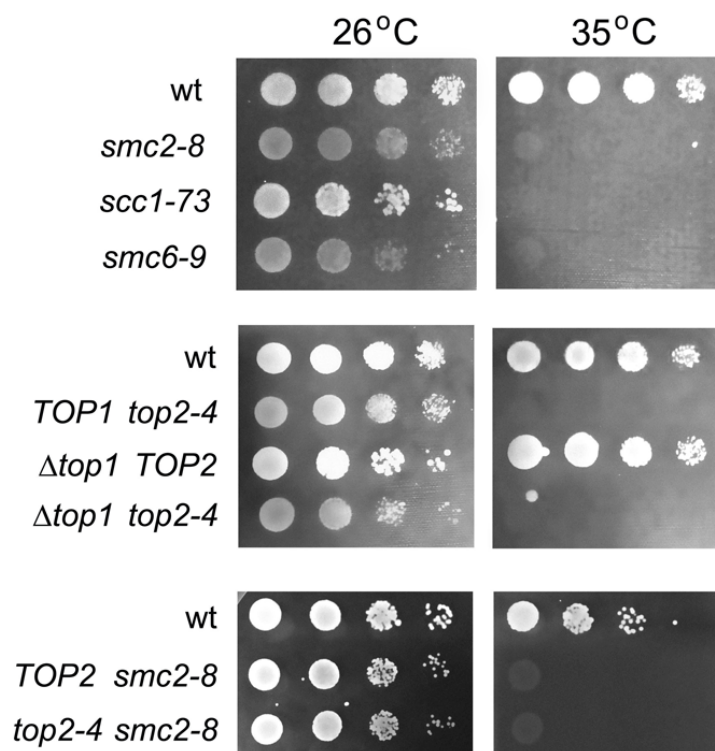

**Appendix Figure S2. Drop assays of yeast strains used in the study.**

Yeast strains carrying thermo-sensitive mutations that inactivate SMC complexes and/or topoisomerase activities were grown to late-log phase at 26°C and spotted in 10-fold dilutions on YPD. Plates were incubated at 26°C or 35°C. *JCW25* was used as the wild-type (wt) control in all plates.
